# Supplementary material for: Moving Forward: Understanding Correlates of Physical Activity and Sedentary Behaviour during COVID-19 in Children and Adolescents—An Integrative Review and Socioecological Approach
Source: MDPI journal article supplement (doi:10.3390/ijerph19031044), 2022-01-18
Supplement: s1 [file s1]

**Supplementary Table S1.** Study Characteristics.

| Authors / Year                   | Country                                  | Study Design                                                                                | COVID-19 Restrictions                                                                                                           | Inclusion/Exclusion Criteria                                                                                                                                             | Participants                                                                                                       | Pertinent participant demographics                                                                                                           | Outcome                                              | Outcome measurement tools                                                                                       | Overall MMAT grade |
|----------------------------------|------------------------------------------|---------------------------------------------------------------------------------------------|---------------------------------------------------------------------------------------------------------------------------------|--------------------------------------------------------------------------------------------------------------------------------------------------------------------------|--------------------------------------------------------------------------------------------------------------------|----------------------------------------------------------------------------------------------------------------------------------------------|------------------------------------------------------|-----------------------------------------------------------------------------------------------------------------|--------------------|
| Dunton et al. (2020) [20]        | USA (35 states and District of Columbia) | Cross-sectional via parental completed self-administered online survey (convenience sample) | Closure of Primary and Secondary schools closed and fitness centres. Partial closure of parks, trails, playgrounds, and beaches | Inclusion - 18+ years, speak and read English, USA resident, parent/guardian of child (aged 5–13 years) with at least 50% custody and planned custody for next 12 months | $n = 211$ ,<br>Mean age children = 8.71 years ( $\sigma$ 2.58).<br>Mean age parents = 42.05 years ( $\sigma$ 5.34) | Parental sample stated to be mainly white, non-Hispanic female college graduates 82.46% of parents married 68.25% household income \$95,000+ | PA<br><br>Screen time and sitting time               | Individually constructed questionnaire (validated)                                                              | ****               |
| Ellis, Dumas, et al. (2020) [21] | Canada                                   | Cross-sectional via self-administered online survey                                         | Varied between states, from stay-at-home orders to social distancing with variations on what facilities were closed.            | Inclusion - High school students, 16-18 years for online recruitment. 14-18 years if already part of longitudinal study                                                  | $n = 1054$<br>Mean age = 16.68 years ( $\sigma$ 0.78)<br>Range 14-18 years                                         | 76.4% female<br>65.7% white<br>67.6% living with both parents                                                                                | Time in daily activities<br><br>PA<br><br>Loneliness | Individually created scale (child completed)<br><br>Godin PA Questionnaire<br><br>Revised UCLA Loneliness Scale | ****               |

**Table S1.** Study characteristics continued.

| Authors /<br>Year                                                  | Country                   | Study design                                                                                                                                                   | COVID-19<br>restrictions                                                                                                                | Inclusion/exclusion<br>criteria                                                                                                                                                                                                       | Participants                                                                                                                                                              | Pertinent<br>participant<br>demographics                                                                                      | Outcome               | Outcome<br>measurement<br>tools                                                     | Overall<br>MMAT<br>grade |
|--------------------------------------------------------------------|---------------------------|----------------------------------------------------------------------------------------------------------------------------------------------------------------|-----------------------------------------------------------------------------------------------------------------------------------------|---------------------------------------------------------------------------------------------------------------------------------------------------------------------------------------------------------------------------------------|---------------------------------------------------------------------------------------------------------------------------------------------------------------------------|-------------------------------------------------------------------------------------------------------------------------------|-----------------------|-------------------------------------------------------------------------------------|--------------------------|
| Gilic et al.<br>(2020) [22]                                        | Bosnia and<br>Herzegovina | Longitudinal<br>via printed<br>questionnaires<br>and PA fitness<br>level testing<br>(baseline). Self-<br>administered<br>online survey<br>(during<br>pandemic) | Social distancing<br>/facility<br>closures/restricting<br>public gatherings                                                             | Inclusion - Aged 15-<br>18 years, attending<br>high school                                                                                                                                                                            | $n = 688$<br>Mean age = 17 years                                                                                                                                          | 322 females<br>65% lived in urban<br>areas<br>Attended regular PE<br>classes 2x/week pre-<br>COVID-19                         | PA                    | Physical<br>Activity<br>Questionnaire<br>for<br>Adolescents<br>(child<br>completed) | *****                    |
| Guerrero<br>et al.<br>(2020) [23]<br>(Linked to<br>[26 and<br>27]) | Canada                    | Cross-sectional<br>via parental<br>completed self-<br>administered<br>online survey                                                                            | Varied between<br>states, from stay-<br>at-home orders to<br>social distancing<br>with variations on<br>what facilities<br>were closed. | Inclusion -<br>Adult/parent of at<br>least 1 child (5-11<br>years) or youth (12-<br>17 years) in<br>household.<br>Exclusion -<br>Households where<br>family member had<br>contracted COVID-<br>19 or family were in<br>self-isolation | $n = 1472$<br>Mean age children =<br>8.1 years<br>( $\sigma$ 2.0)<br>Mean age youth = 14.9<br>years<br>( $\sigma$ 1.7)<br>Mean age parents =<br>45.12<br>( $\sigma$ 7.55) | Parents<br>54% female<br>84.1%<br>married/common law<br>70.1% employed full<br>time<br>72.4%<br>college/university<br>degree. | PA<br><br>Screen time | Items from<br>the Canadian<br>Health<br>Measures<br>Survey                          | ****                     |

**Table S1.** Study characteristics continued

| Authors /<br>Year                  | Country             | Study design                                                                        | COVID-19<br>restrictions | Inclusion/exclusion<br>criteria                                                                                                                                                                                                                               | Participants                                                                                                        | Pertinent<br>participant<br>demographics                                                            | Outcome                                                                                                                    | Outcome<br>measurement<br>tools                                                               | Overall<br>MMAT<br>grade |
|------------------------------------|---------------------|-------------------------------------------------------------------------------------|--------------------------|---------------------------------------------------------------------------------------------------------------------------------------------------------------------------------------------------------------------------------------------------------------|---------------------------------------------------------------------------------------------------------------------|-----------------------------------------------------------------------------------------------------|----------------------------------------------------------------------------------------------------------------------------|-----------------------------------------------------------------------------------------------|--------------------------|
| McCormack<br>et al. (2020)<br>[24] | Canada<br>(Calgary) | Cross-sectional<br>via parental<br>completed self-<br>administered<br>online survey | Stay-at-home<br>order    | Parent of at least 1<br>child (5-17 years).                                                                                                                                                                                                                   | $n = 328$<br>Mean age children 10.8<br>years<br>( $\sigma$ 4.0)<br>Mean age parents = 42.6<br>years ( $\sigma$ 8.8) | 67.1% female<br>58.2% degree of higher<br>53% working full-time<br>56.4% Caucasian<br>82.6% married | Parental<br>anxiety<br><br>Perceived<br>change in<br>child's PA and<br>sedentary<br>behaviour<br><br>PA<br><br>Screen time | Individually<br>constructed<br>questionnaire<br>(validated)                                   | ***                      |
| Medrano et<br>al. (2020)<br>[25]   | Spain               | Longitudinal<br>via self-<br>administered<br>online survey                          | Stay-at-home<br>order    | Inclusion -<br>Children and<br>Adolescents aged<br>8-16 years<br>attending school<br>participating in the<br>MUGI project.<br>Exclusion - Pupils<br>with an intellectual<br>or physical<br>disability<br>preventing<br>response to lifestyle<br>questionnaire | $n = 113$<br>Mean age = 12.0 years<br>( $\sigma$ 2.6)                                                               | 48.7% female<br>51% not meeting PA<br>recommendations pre-<br>COVID-19                              | PA<br><br><br>Screen time                                                                                                  | The Youth<br>Activity<br>Profile<br><br>The Youth<br>Activity<br>Profile (child<br>completed) | ****                     |

**Table S1.** Study characteristics continued.

| Authors / Year                                   | Country | Study design                                                           | COVID-19 restrictions                                                                                               | Inclusion/exclusion criteria                                                                                                                                                                          | Participants                                                                                                                                                  | Pertinent participant demographics                                                                         | Outcome                                      | Outcome measurement tools                          | Overall MMAT grade |
|--------------------------------------------------|---------|------------------------------------------------------------------------|---------------------------------------------------------------------------------------------------------------------|-------------------------------------------------------------------------------------------------------------------------------------------------------------------------------------------------------|---------------------------------------------------------------------------------------------------------------------------------------------------------------|------------------------------------------------------------------------------------------------------------|----------------------------------------------|----------------------------------------------------|--------------------|
| Mitra et al. (2020) [26] (Linked to [23 and 27]) | Canada  | Cross-sectional via parental completed self-administered online survey | Varied between states, from stay-at-home orders to social distancing with variations on what facilities were closed | Inclusion - Adult/parent of at least 1 child (5-11 years) or youth (12-17 years) in household.<br>Exclusion - Households where family member had contracted COVID-19 or family were in self-isolation | $n = 1472$<br>Mean age children = 8.1 years ( $\sigma$ 2.0)<br>Mean age Youth = 14.9 years ( $\sigma$ 1.7)<br>Mean age parents = 45.12 years ( $\sigma$ 7.55) | 89% college or university graduates<br>70% worked full-time<br>72% lived in houses versus apartments       | Movement behaviours<br><br>Built environment | Individually constructed questions (validated)     | ****               |
| Moore et al. (2020) [27] (Linked to [23 and 26]) | Canada  | Cross-sectional via parental completed self-administered online survey | Varied between states, from stay-at-home orders to social distancing with variations on what facilities were closed | Inclusion - Adult/parent of at least 1 child (5-11 years) or youth (12-17 years) in household.<br>Exclusion - Households where family member had contracted COVID-19 or family were in self-isolation | $n = 1472$<br>Mean age children = 8.1 years ( $\sigma$ 2.0)<br>Youth = 14.9 years ( $\sigma$ 1.7) Parents = 45.12 ( $\sigma$ 7.55)                            | 54% female<br>84.1% married/common law<br>70.1% employed full time<br>88.7% college or university educated | Movement behaviours                          | Individually constructed questionnaire (validated) | ****               |

**Table S1.** Study characteristics continued.

| Authors /<br>Year                                                       | Country  | Study design                                                                                    | COVID-19<br>restrictions | Inclusion/exclusion<br>criteria                                | Participants                                                                              | Pertinent<br>participant<br>demographics                                                        | Outcome                               | Outcome<br>measurement<br>tools                                                                                                       | Overall<br>MMAT<br>grade |
|-------------------------------------------------------------------------|----------|-------------------------------------------------------------------------------------------------|--------------------------|----------------------------------------------------------------|-------------------------------------------------------------------------------------------|-------------------------------------------------------------------------------------------------|---------------------------------------|---------------------------------------------------------------------------------------------------------------------------------------|--------------------------|
| Ng et al.<br>(2020) [28]                                                | Ireland  | Mixed<br>methods<br>convergent<br>cross-sectional<br>via self-<br>administered<br>online survey | Stay-at-home<br>order    | Adolescents aged<br>12-18 years from 1<br>of 6 schools         | <i>n</i> = 1214<br>Range 12-18 years                                                      | 72% female<br>57.3% aged 12-15 years                                                            | PA<br><br>Change in PA                | PA PACE+<br>instrument<br><br>Individually<br>constructed<br>question<br>(child<br>completed)                                         | ***                      |
| Ozturk<br>and Yalçin<br>(2021) [29]                                     | Turkey   | Cross-sectional<br>via parental<br>completed<br>self-<br>administered<br>online survey          | Stay-at-home-<br>order   | Parent of child aged<br>6-13 years                             | <i>n</i> = 1115<br>Mean age children =<br>9.03 years ( $\sigma$ 1.95)<br>Range 6-13 years | 53.4% of children<br>female<br>44% household over<br>£400 per month/ 4000-<br>6000 Turkish Lira | Screen Time<br><br>Parental Practices | Individually<br>constructed<br>questionnaire<br>(unclear<br>validation)<br><br>Parental<br>Practices Scale<br>(parental<br>completed) | ****                     |
| Pombo et<br>al. (2020) -<br>only data<br>for 6–12-<br>year-olds<br>[30] | Portugal | Cross-sectional<br>via parental<br>completed<br>self-<br>administered<br>online survey          | Stay-at-home<br>order    | Parent/guardian of<br>child < 13 years<br>residing in Portugal | <i>n</i> = 932<br>Range 6-12 years                                                        | Unable to separate<br>demographics for the<br>specifically required<br>age groups               | PA                                    | Individually<br>constructed<br>questionnaire<br>(validated)                                                                           | ****                     |

**Table S1.** Study characteristics continued

| Authors /<br>Year                                                                         | Country                         | Study design                                                                          | COVID-19<br>restrictions                                                                                                                                                                                        | Inclusion/exclusion<br>criteria                             | Participants                                                               | Pertinent<br>participant<br>demographics                                          | Outcome                                                                      | Outcome<br>measurement<br>tools                                                               | Overall<br>MMAT<br>grade |
|-------------------------------------------------------------------------------------------|---------------------------------|---------------------------------------------------------------------------------------|-----------------------------------------------------------------------------------------------------------------------------------------------------------------------------------------------------------------|-------------------------------------------------------------|----------------------------------------------------------------------------|-----------------------------------------------------------------------------------|------------------------------------------------------------------------------|-----------------------------------------------------------------------------------------------|--------------------------|
| Sá et al.<br>(2020)<br>only data<br>for 6–12-<br>year-olds<br>[31]<br>(Linked to<br>[33]) | Brazil                          | Cross-sectional<br>study parental<br>completed self-<br>administered<br>online survey | Social distancing<br>and stay-at home-<br>order but variable<br>across five<br>country regions                                                                                                                  | Parent of child aged<br>< 13 years in the<br>same household | $n = 423$<br>Range 6-12 years                                              | Unable to separate<br>demographics for the<br>specifically required<br>age groups | PA<br><br>Sedentary time<br>and Screen time                                  | Individually<br>constructed<br>questionnaire<br>(validated)                                   | ***                      |
| Sekulic et<br>al. (2020)<br>[32]<br>(Linked to<br>[34])                                   | Croatia<br>(Split-<br>Dalmatia) | Longitudinal<br>study self-<br>administered<br>online survey                          | Social<br>distancing/closure<br>of schools and<br>some public<br>places/bans on<br>public<br>gatherings/no<br>strict prohibition<br>of different forms<br>of individual<br>training (e.g.,<br>running, cycling) | Healthy high school<br>adolescent                           | $n = 388$<br>Mean age = 16.4 years<br>( $\sigma$ 1.9)<br>Range 15-18 years | 126 female<br>35% involved in<br>organised sports<br>activities pre-COVID-<br>19  | PA (baseline<br>March 20)<br><br>Baseline<br>physical fitness<br>(Sept 2019) | Physical<br>Activity<br>Questionnaire<br>for<br>Adolescents<br><br>Mandatory<br>fitness panel | ****                     |

**Table S1.** Study characteristics continued

| Authors /<br>Year                                               | Country                  | Study design                                                             | COVID-19<br>restrictions                                                                                                                                                       | Inclusion/exclusion<br>criteria     | Participants                                                             | Pertinent<br>participant<br>demographics                                                              | Outcome                                                                       | Outcome<br>measurement<br>tools                                                | Overall<br>MMAT<br>grade |
|-----------------------------------------------------------------|--------------------------|--------------------------------------------------------------------------|--------------------------------------------------------------------------------------------------------------------------------------------------------------------------------|-------------------------------------|--------------------------------------------------------------------------|-------------------------------------------------------------------------------------------------------|-------------------------------------------------------------------------------|--------------------------------------------------------------------------------|--------------------------|
| Siegle et al. (2020) (only data for 6-12) [33] (Linked to [31]) | Brazil                   | Cross-sectional study parental completed self-administered online survey | Social distancing and stay-at home-order but variable across five country regions                                                                                              | Parent/guardian of child < 13 years | <i>n</i> = 423                                                           | <i>n</i> = 285 6–9-year-olds<br><i>n</i> = 138 10–12-year-olds<br>no other demographic data presented | Household Characteristics<br>PA<br>Domestic routines<br><br>Children routines | Individually constructed questionnaire (validated)                             | ***                      |
| Zenic et al. (2020) [34] (Linked to [32])                       | Croatia (Split-Dalmatia) | Longitudinal study via self-administered online survey                   | Social distancing/closure of schools and some public places/bans on public gatherings/no strict prohibition of different forms of individual training (e.g., running, cycling) | High School Adolescents             | <i>n</i> = 823<br>Mean age = 6.5 years ( $\sigma$ 2.1)                   | Minimal details; higher baseline PA in urban adolescents                                              | PA (baseline March 2020)<br><br>Physical fitness (baseline Sept 2019)         | Physical Activity Questionnaire for Adolescents<br><br>Mandatory fitness panel | ****                     |
| Zhang et al. (2020) [35]                                        | China                    | Cross-sectional study via self-administered online survey                | Stay-at-home order                                                                                                                                                             | Grade 4 to 6 of primary schools     | <i>n</i> = 9979<br>Mean age = 11.63 ( $\sigma$ 1.23)<br>Range 9-14 years | 49% female<br>160 min PA/week in obligatory (PE) classes pre-COVID-19                                 | PA<br><br>Mood                                                                | IPAQ – SF<br><br>Profile of mood states                                        | ***                      |

<sup>a</sup> COVID-19 = novel coronavirus disease 2019; EQ-5D = EuroQol-5 dimension; GAD-7 = general anxiety disorder-7; HADS = hospital anxiety and depression scale; HRQoL = health-related quality of life; IPAQ = International Physical Activity Questionnaire; KSA, Kingdom of Saudi Arabia; QoL = quality of life; MET = metabolic equivalent; mins = minutes; MMAT = mixed methods assessment tool; MVPA = moderate-to-vigorous physical activity; *n* = number; PA = physical activity; PE = Physical Education; PROMIS = patient-reported outcomes measurement information system; RA =

rheumatoid arthritis; SB = sedentary behaviour; SD = standard deviation; SES = socioeconomic status; SF = short form; UK = United Kingdom; USA = United States of America; WHO = World Health Organization.

<sup>b</sup>Overall study quality was assessed using the Mixed Methods Assessment Tool (MMAT) and is reported using asterisks (\*) as a descriptor, ranging from 1\*, where 20% of the quality criteria have been met, to 5\*, where 100% of the quality criteria have been met [14].
